# Supplementary material
Source: publisher figshare collection journal article supplement (https://gsajournals.figshare.com/articles/dataset/_/14591145)
Supplement: Supplementary file 1 [file 1]

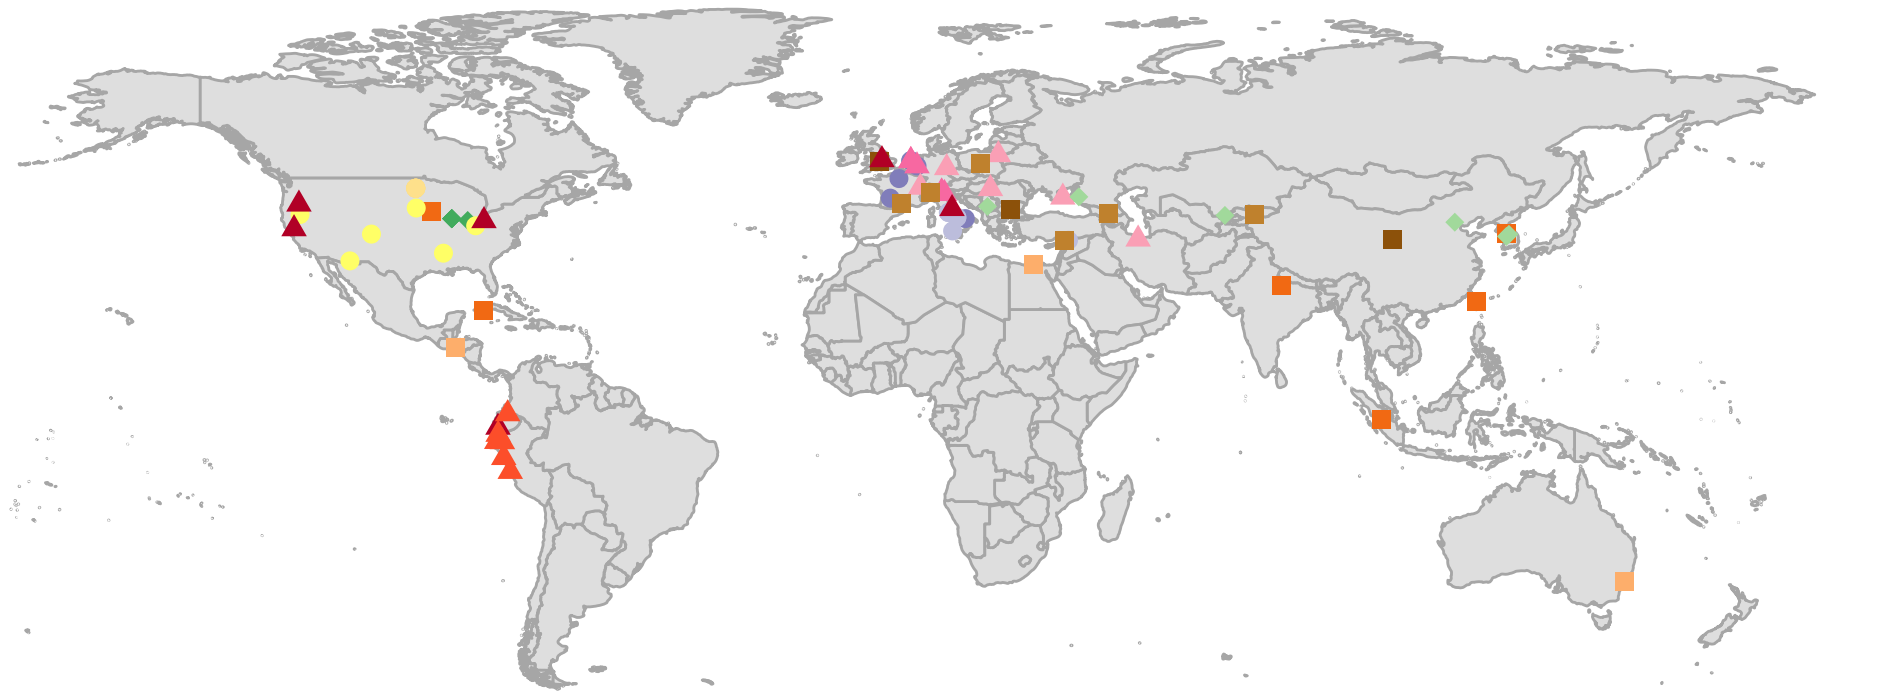

-100

0

100

200

■ *B. rapa*

● *C. endivia*

▲ *C. intybus*

◆ *G. max*

● *H. annuus*

■ *Lactuca*

▲ *Solanum*

● Domesticated

● Domesticated

● Domesticated

● Inbred lines

● Domesticated

● *L. sativa*

● *S. lycopersicum*

● Wild

● Landrace

● Wild

● Wild

● Wild

● *L. serriola*

● *S. pimpinellifolium*
